# Supplementary material for: Current Systemic Treatment Options in Metastatic Urothelial Carcinoma after Progression on Checkpoint Inhibition Therapy—A Systemic Review Combined with Single-Group Meta-Analysis of Three Studies Testing Enfortumab Vedotin
Source: Cancers (Basel). 2021 Jun 26;13(13):3206. doi: 10.3390/cancers13133206 (PMC8268971; doi:10.3390/cancers13133206)
Supplement: Supplementary file 1 [file cancers-13-03206-s001.zip › cancers-1222385-supplementary.pdf]

# Current Systemic Treatment Options in Metastatic Urothelial Carcinoma after Progression on Checkpoint Inhibition Therapy—A Systemic Review Combined with Single-Group Meta-Analysis of Three Studies Testing Enfortumab Vedotin

Susanne Deininger, Peter Törzsök, David Oswald and Lukas Lusuardi

Presentation of selected statistical calculations of the single group meta-analysis of three studies testing Enfortumab vedotin (EV) in a dosage of 1.25 mg/ kg of body weight in metastatic urothelial cancer after progression under platinum- based chemotherapy (CT) and checkpoint inhibitor (CPI) therapy [1-3]. The following numbering applies to the entire document: study 1 [1], study 2 [2] and study 3 [3].

## 1. Response rates

### 1.1. Confirmed complete response (CR)

|                    | study 1 | study 2 | study 3 | total |
|--------------------|---------|---------|---------|-------|
| $n_{\text{meta}}$  | 74      | 125     | 288     | 487   |
| $n_{\text{event}}$ | 8       | 15      | 14      | 37    |

Estimated heterogeneity:

- $\text{Tau}^2 = 0.24$
- Higgins  $I^2 = 72.1\%$
- Cochran's  $Q_{\text{het}} = 7.18$  ( $p = 0.028^*$ )

Statistically relevant heterogeneity between the studies was evident, thus the random effect model was used for the present data situation.

Random effect model:

| Study                  | Effect estimators | 95%-Confidence Interval (CI) |             | Weight of the study |
|------------------------|-------------------|------------------------------|-------------|---------------------|
|                        |                   | Lower limit                  | Upper limit |                     |
| 1                      | 10.81%            | 4.78%                        | 20.20%      | 29.3%               |
| 2                      | 12.00%            | 6.87%                        | 19.02%      | 35.3%               |
| 3                      | 4.86%             | 2.68%                        | 8.02%       | 35.4%               |
| Meta effect estimators | 8.52%             | 4.62%                        | 15.17%      | 100%                |

Forest plot:

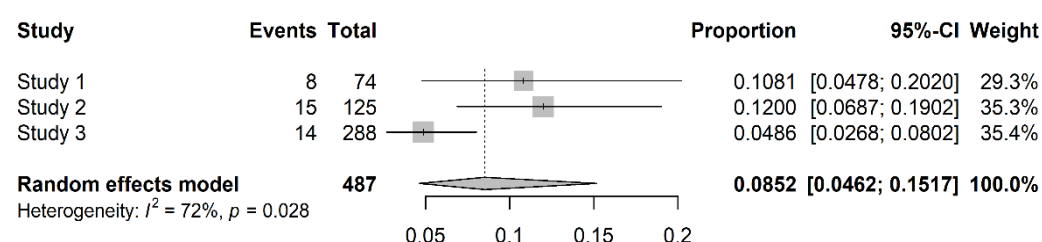

### 1.2. Confirmed partial response (PR)

|                          | study 1 | study 2 | study 3 | total |
|--------------------------|---------|---------|---------|-------|
| <b>n<sub>meta</sub></b>  | 74      | 125     | 288     | 487   |
| <b>n<sub>event</sub></b> | 25      | 40      | 103     | 168   |

Estimated heterogeneity:

- $\tau^2 = 0$
- Higgins  $I^2 = 0\%$
- Cochran's  $Q_{het} = 0.57$  ( $p = 0.754$ )

There was no statistically relevant heterogeneity between the studies, thus the fixed effect model was used for the present data situation.

Fixed effect model:

| Study                  | Effect estimators | 95%-Confidence Interval (CI) |             | Weight of the study |
|------------------------|-------------------|------------------------------|-------------|---------------------|
|                        |                   | Lower limit                  | Upper limit |                     |
| 1                      | 33.78%            | 23.19%                       | 45.72%      | 15.1%               |
| 2                      | 32.00%            | 23.94%                       | 40.93%      | 24.7%               |
| 3                      | 35.76%            | 30.23%                       | 41.60%      | 60.2%               |
| Meta effect estimators | 34.52%            | 30.42%                       | 38.85%      | 100%                |

Forest plot:

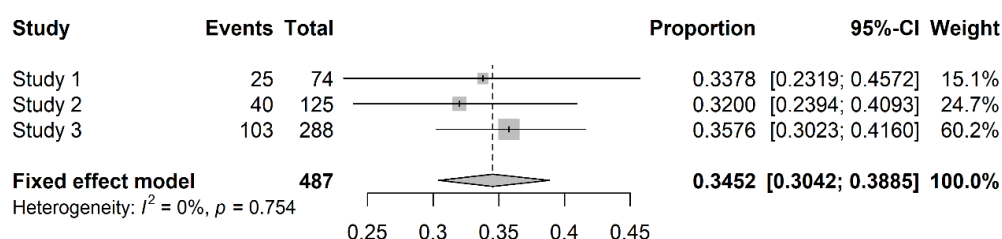

### 1.3. Confirmed stable disease (SD)

|                          | study 1 | study 2 | study 3 | total |
|--------------------------|---------|---------|---------|-------|
| <b>n<sub>meta</sub></b>  | 74      | 125     | 288     | 487   |
| <b>n<sub>event</sub></b> | 27      | 35      | 90      | 152   |

Estimated heterogeneity:

- $\tau^2 = 0$
- Higgins  $I^2 = 0\%$
- Cochran's  $Q_{het} = 1.55$  ( $p = 0.460$ )

There was no statistically relevant heterogeneity between the studies, thus the fixed effect-model was used for the present data situation.

Fixed effect model:

| Study                  | Effect estimators | 95%-Confidence Interval (CI) |             | Weight of the study |
|------------------------|-------------------|------------------------------|-------------|---------------------|
|                        |                   | Lower limit                  | Upper limit |                     |
| 1                      | 36.49%            | 25.60%                       | 48.49%      | 16.5%               |
| 2                      | 28.00%            | 20.34%                       | 36.73%      | 24.2%               |
| 3                      | 31.25%            | 25.94%                       | 36.95%      | 59.4%               |
| Meta effect estimators | 31.27%            | 27.30%                       | 35.53%      | 100%                |

Forest plot:

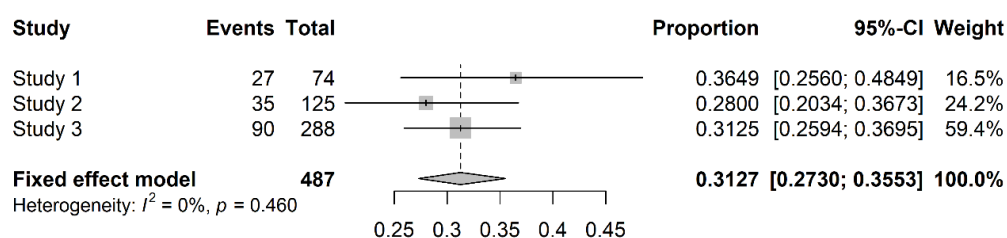

#### 1.4. Confirmed progressive disease (PD)

|                    | study 1 | study 2 | study 3 | total |
|--------------------|---------|---------|---------|-------|
| n <sub>meta</sub>  | 74      | 125     | 288     | 487   |
| n <sub>event</sub> | 14      | 23      | 44      | 81    |

Estimated heterogeneity:

- $\tau^2 = 0$
- Higgins  $I^2 = 0\%$
- Cochran's  $Q_{het} = 0.94$  ( $p = 0.625$ )

There was no statistically relevant heterogeneity between the studies, thus the fixed effect model was used for the present data situation.

Fixed effect model:

| Study                  | Effect estimators | 95%-Confidence Interval (CI) |             | Weight of the study |
|------------------------|-------------------|------------------------------|-------------|---------------------|
|                        |                   | Lower limit                  | Upper limit |                     |
| 1                      | 18.92%            | 10.75%                       | 29.70%      | 16.8%               |
| 2                      | 18.40%            | 12.04%                       | 26.32%      | 27.8%               |
| 3                      | 15.28%            | 11.33%                       | 19.96%      | 55.3%               |
| Meta effect estimators | 16.70%            | 13.63%                       | 20.28%      | 100%                |

Forest plot:

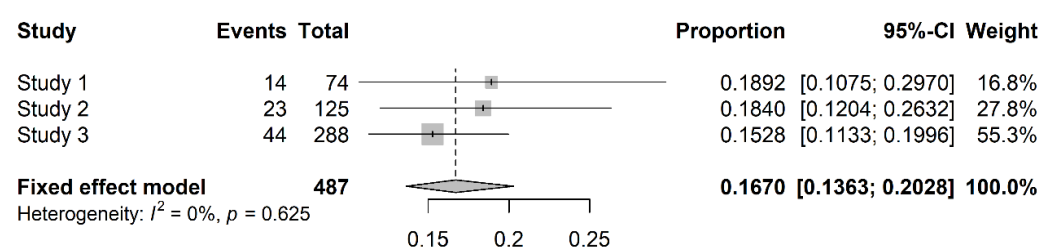

#### 1.5. Objective response rate (ORR)

|                    | study 1 | study 2 | study 3 | total |
|--------------------|---------|---------|---------|-------|
| n <sub>meta</sub>  | 74      | 125     | 288     | 487   |
| n <sub>event</sub> | 33      | 55      | 117     | 205   |

Estimated heterogeneity:

- $\tau^2 = 0$
- Higgins  $I^2 = 0\%$
- Cochran's  $Q_{het} = 0.63$  ( $p = 0.730$ )

There was no statistically relevant heterogeneity between the studies, thus the fixed effect model was used for the present data situation.

Fixed effect model:

| Study                  | Effect estimators | 95%-Confidence Interval (CI) |             | Weight of the study |
|------------------------|-------------------|------------------------------|-------------|---------------------|
|                        |                   | Lower limit                  | Upper limit |                     |
| 1                      | 44.59%            | 33.02%                       | 56.61%      | 15.4%               |
| 2                      | 44.00%            | 35.14%                       | 53.16%      | 26.0%               |
| 3                      | 40.62%            | 34.90%                       | 46.54%      | 58.6%               |
| Meta effect estimators | 42.10%            | 37.79%                       | 46.54%      | 100%                |

Forest plot:

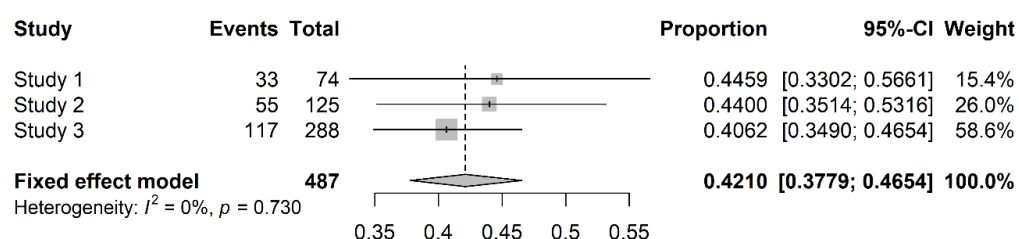

## 2. Time- to- event variables

### 2.1. Duration of response (DoR)

|             | study 1 | study 2 | study 3 |
|-------------|---------|---------|---------|
| $n_{meta}$  | 33      | 55      | 117     |
| $n_{event}$ | 7.5     | 7.6     | 7.39    |

Effect estimators of the single-group meta-analysis based on the plots of Kaplan Meier [4]:

|                                  | Effects estimator | 95%- CI         |
|----------------------------------|-------------------|-----------------|
| Meta effect estimator median DoR | 7.48              | not predictable |

Estimated heterogeneity: Higgins  $I^2 = 31.72\%$ .

### 2.2. progression free survival (PFS)

|             | study 1 | study 2 | study 3 |
|-------------|---------|---------|---------|
| $n_{meta}$  | 74      | 125     | 301     |
| $n_{event}$ | 6.6     | 5.8     | 5.55    |

Effect estimators of the single-group meta-analysis based on the plots of Kaplan Meier [4]:

|                                  | Effect Estimator | 95%- CI     |             |
|----------------------------------|------------------|-------------|-------------|
|                                  |                  | Lower limit | Upper limit |
| Meta effect estimator median PFS | 5.93             | 5.41        | 6.57        |

Estimated heterogeneity: Higgins  $I^2 = 0\%$ .

### 2.3. overall survival (OS)

|             | study 1 | study 2 | study 3 |
|-------------|---------|---------|---------|
| $n_{meta}$  | 89      | 125     | 301     |
| $n_{event}$ | 12.3    | 11.7    | 12.88   |

Effect estimators of the single-group meta-analysis based on the plots of Kaplan Meier [4]:

|                                 | Effect estimator | 95%- CI         |
|---------------------------------|------------------|-----------------|
| Meta effect estimator median OS | 12.81            | not predictable |

Estimated heterogeneity: Higgins  $I^2 = 5.2\%$ .

## Reference

1. Rosenberg, J.; Sridhar, S.S.; Zhang, J.; Smith, D.; Ruether, D.; Flaig, T.W.; Baranda, J.; Lang, J.; Plimack, E.R.; Sangha, R.; et al. EV-101: A Phase I Study of Single-Agent Enfortumab Vedotin in Patients With Nectin-4-Positive Solid Tumors, Including Metastatic Urothelial Carcinoma. *J. Clin. Oncol.* **2020**, *38*, 1041–1049, doi:10.1200/JCO.19.02044.
2. Rosenberg, J.E.; O'Donnell, P.H.; Balar, A.V.; McGregor, B.A.; Heath, E.I.; Yu, E.Y.; Galsky, M.D.; Hahn, N.M.; Gartner, E.M.; Pinelli, J.M.; et al. Pivotal Study of Enfortumab Vedotin in Urothelial Carcinoma After Platinum and Anti-Programmed Death 1/Programmed Death Ligand 1 Therapy. *J. Clin. Oncol.* **2019**, *37*, 2592–2600, doi:10.1200/JCO.19.01140.
3. Powles, T.; Rosenberg, J.E.; Sonpavde, G.P.; Loriot, Y.; Duran, I.; Lee, J.L.; Matsubara, N.; Vulsteke, C.; Castellano, D.; Wu, C.; et al. Enfortumab Vedotin in Previously Treated Advanced Urothelial Carcinoma. *N. Engl. J. Med.* **2021**, *384*, 1125–1135, doi:10.1056/NEJMoa2035807.
4. Combescure, C.; Foucher, Y.; Jackson, D. Meta-analysis of single-arm survival studies: a distribution-free approach for estimating summary survival curves with random effects. *Stat. Med.* **2014**, *33*, 2521–2537.
